# Supplementary material for: R-Spondin1 protects gastric stem cells and mitigates gastric GVHD in allogeneic hematopoietic stem cell transplantation
Source: PubMed Central journal article supplement — Blood Adv. 2023 Dec 27;8(3):725–31. doi: 10.1182/bloodadvances.2023011034 (PMC10847017; doi:10.1182/bloodadvances.2023011034), 2023-12-27

***Supplemental Figure 1. R-Spo1 does not alter the mucus layer on surface of gastric epithelium in naïve mice.***

PAS staining of the fundic glands in the stomach. Mice were treated with R-Spo1 same as in Figure 1. Bars, 100  $\mu$ m.

***Supplemental Figure 2. Bacterial densities of gastric draining lymph nodes and duodenum content quantified by 16S rRNA qPCR were not different between syngeneic and allogeneic recipients.***

Lethally irradiated B6D2F1 mice were transplanted and treated with R-Spo1 as in Figure 2. The stomach and duodenum were harvested on day +7. **(A)** Numbers of bacterial colony in gastric draining lymph nodes (n = 9-10 /group). **(B-C)** Bacterial density of gastric draining lymph node **(B, n = 9-10 /group)** or duodenum content **(C, n = 7-10 /group)** collected from mice treated as indicated. Data from two experiments were combined and shown as mean  $\pm$  SEM.

Control

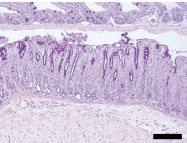

R-Spo1

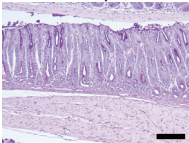

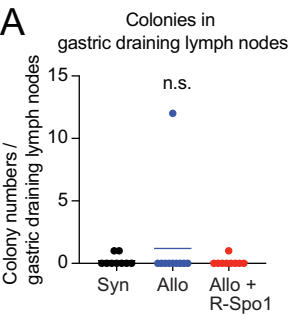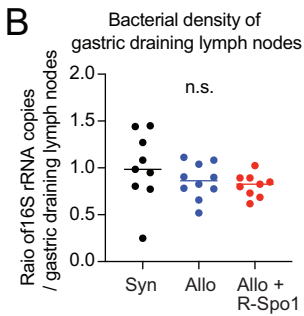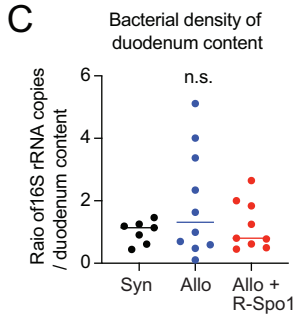

Supplement: BLOODA_ADV-2023-011034-mmc1.pdf [file BLOODA_ADV-2023-011034-mmc1.pdf]
